# Supplementary material for: IRF5 promotes the proliferation of human thyroid cancer cells
Source: PubMed Central journal article supplement (PMC3444366; doi:10.1186/1476-4598-11-21), 2012-04-16
Supplement: 1476-4598-11-21-S3.pdf [file 1476-4598-11-21-S3.pdf]

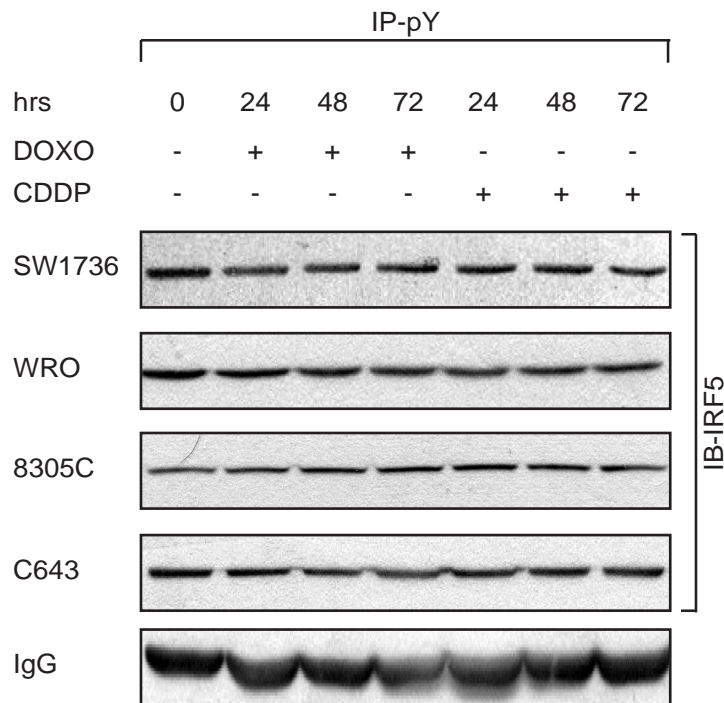

**Additional file 3. IRF5 tyrosine phosphorylation is not modulate from DNA-damage agents treatment in thyroid cancer cells.**

The specified cell lines were treated with 2 $\mu$ M Doxorubicin (Dox) or 5 $\mu$ g/mL cis-diamminedichloroplatinum (CDDP) for indicate time. An immunoprecipitaion anti-pY was perform, followed by immunoblot anti-IRF-5. The immunoglobuline (IgG) was used as loading control.
